# Supplementary material
Source: HighWire-hosted journal article supplement (https://cmaj.ca/highwire/filestream/150992/field_highwire_adjunct_files/0/240061-res-1-at.pdf)
Supplement: 240061-res-1-at.pdf [file 240061-res-1-at.pdf]

| NUMBER                                         | ITEM                                     | DESCRIPTION                                                                                                     | MANUSCRIPT                                                                                                                                                                                  | LOCATION                  |
|------------------------------------------------|------------------------------------------|-----------------------------------------------------------------------------------------------------------------|---------------------------------------------------------------------------------------------------------------------------------------------------------------------------------------------|---------------------------|
| <b>Domain 1: Research team and reflexivity</b> |                                          |                                                                                                                 |                                                                                                                                                                                             |                           |
| Personal Characteristics                       |                                          |                                                                                                                 |                                                                                                                                                                                             |                           |
| 1                                              | Interviewer/facilitator                  | Which author/s conducted the interview or focus group?                                                          | Drew Burchell                                                                                                                                                                               | Page 4&5                  |
| 2                                              | Credentials                              | What were the researcher's credentials? <i>E.g. PhD, MD</i>                                                     | BSc MA                                                                                                                                                                                      | Page 1                    |
| 3                                              | Occupation                               | What was their occupation at the time of the study?                                                             | Research Assistant                                                                                                                                                                          | Page 4                    |
| 4                                              | Gender                                   | Was the researcher male or female?                                                                              | Nonbinary, agender                                                                                                                                                                          | Page 4                    |
| 5                                              | Experience and training                  | What experience or training did the researcher have?                                                            | Previous years experience with qualitative research and interviewing LGBTQ+ populations                                                                                                     | Cover letter, page 4      |
| Relationship with participants                 |                                          |                                                                                                                 |                                                                                                                                                                                             |                           |
| 6                                              | Relationship established                 | Was a relationship established prior to study commencement?                                                     | Nothing beyond being in contact during eligibility screening.                                                                                                                               | Pages 4&5                 |
| 7                                              | Participant knowledge of the interviewer | What did the participants know about the researcher? <i>e.g. personal goals, reasons for doing the research</i> | The interviewer was transparent with participants regarding their gender identity and personal experiences accessing gender affirming care, as well as their keen interest in trans health. | Page 5                    |
| 8                                              | Interviewer characteristics              | What characteristics were reported about the                                                                    | Gender identity                                                                                                                                                                             | Pages 4 & 5, cover letter |

|                               |                                       |                                                                                                                                                                 |                                                                                                                                                             |        |
|-------------------------------|---------------------------------------|-----------------------------------------------------------------------------------------------------------------------------------------------------------------|-------------------------------------------------------------------------------------------------------------------------------------------------------------|--------|
|                               |                                       | interviewer/facilitator? e.g. <i>Bias, assumptions, reasons and interests in the research topic</i>                                                             |                                                                                                                                                             |        |
| <b>Domain 2: study design</b> |                                       |                                                                                                                                                                 |                                                                                                                                                             |        |
| Theoretical framework         |                                       |                                                                                                                                                                 |                                                                                                                                                             |        |
| 9                             | Methodological orientation and Theory | What methodological orientation was stated to underpin the study? e.g. <i>grounded theory, discourse analysis, ethnography, phenomenology, content analysis</i> | Qualitative description influenced by phenomenology                                                                                                         | Page 4 |
| Participant selection         |                                       |                                                                                                                                                                 |                                                                                                                                                             |        |
| 10                            | Sampling                              | How were participants selected? e.g. <i>purposive, convenience, consecutive, snowball</i>                                                                       | Purposive and snowball sampling                                                                                                                             | Page 4 |
| 11                            | Method of approach                    | How were participants approached? e.g. <i>face-to-face, telephone, mail, email</i>                                                                              | Participants self-selected by emailing in response to recruitment materials posted online                                                                   | Page 4 |
| 12                            | Sample size                           | How many participants were in the study?                                                                                                                        | 21                                                                                                                                                          | Page 6 |
| 13                            | Non-participation                     | How many people refused to participate or dropped out? Reasons?                                                                                                 | 2 people completed one interview and withdrew before completing a second, citing personal reasons. Consented to keep their first interviews in the dataset. | Page 6 |
| Setting                       |                                       |                                                                                                                                                                 |                                                                                                                                                             |        |
| 14                            | Setting of data collection            | Where was the data collected? e.g. <i>home, clinic, workplace</i>                                                                                               | Interviews conducted via Zoom with audio recording. The                                                                                                     | Page 5 |

|                        |                              |                                                                                          |                                                                                                                                                                         |                    |
|------------------------|------------------------------|------------------------------------------------------------------------------------------|-------------------------------------------------------------------------------------------------------------------------------------------------------------------------|--------------------|
|                        |                              |                                                                                          | interviewer was in a private setting (home office) and the participants were in a private setting of their own choosing.                                                |                    |
| 15                     | Presence of non-participants | Was anyone else present besides the participants and researchers?                        | No, participants were allowed to have a support person present but none chose to do so                                                                                  | Page 6             |
| 16                     | Description of sample        | What are the important characteristics of the sample? <i>e.g. demographic data, date</i> | See table 1.                                                                                                                                                            | Table 1            |
| <b>Data collection</b> |                              |                                                                                          |                                                                                                                                                                         |                    |
| 17                     | Interview guide              | Were questions, prompts, guides provided by the authors? Was it pilot tested?            | See Appendix A. An informal pilot test was carried out between L.T.J. and D.B.                                                                                          | Page 5, Appendix A |
| 18                     | Repeat interviews            | Were repeat interviews carried out? If yes, how many?                                    | Eighteen participants completed two interviews. One participant completed 3 interviews due to technical difficulties. Two participants dropped out after one interview. | Pages 5&6          |
| 19                     | Audio/visual recording       | Did the research use audio or visual recording to collect the data?                      | Audio recording was done with the Olympus digital voice recorder, WS-852                                                                                                | Page 5             |

|                                        |                                |                                                                          |                                                                                                                                                                                                              |            |
|----------------------------------------|--------------------------------|--------------------------------------------------------------------------|--------------------------------------------------------------------------------------------------------------------------------------------------------------------------------------------------------------|------------|
| 20                                     | Field notes                    | Were field notes made during and/or after the interview or focus group?  | Yes, sparse field notes were made during the interview but ultimately did not contribute to the data.                                                                                                        | N/A        |
| 21                                     | Duration                       | What was the duration of the interviews or focus group?                  | Interview durations ranged from 18-91 minutes, with a median duration of 49 minutes.                                                                                                                         | Page 7     |
| 22                                     | Saturation                     | Was data saturation discussed?                                           | Yes, periodic meetings amongst the two coders (H.M., L.T.J.) and the interviewer (D.B.) were held after reviewing transcripts. Recruitment was stopped when no new themes were being identified in the data. | Pages 5-6  |
| 23                                     | Transcripts returned           | Were transcripts returned to participants for comment and/or correction? | Yes.                                                                                                                                                                                                         | Page 5     |
| <b>Domain 3: analysis and findings</b> |                                |                                                                          |                                                                                                                                                                                                              |            |
| Data analysis                          |                                |                                                                          |                                                                                                                                                                                                              |            |
| 24                                     | Number of data coders          | How many data coders coded the data?                                     | Two – H.M. and L.T.J.                                                                                                                                                                                        | Page 5     |
| 25                                     | Description of the coding tree | Did authors provide a description of the coding tree?                    | Yes.                                                                                                                                                                                                         | Appendix B |
| 26                                     | Derivation of themes           | Were themes identified in advance or derived from the data?              | Themes were derived from the data.                                                                                                                                                                           | Pages 5-6  |
| 27                                     | Software                       | What software, if applicable, was used to manage the data?               | NVivo qualitative data analysis software; QSR International Pty Ltd,                                                                                                                                         | Page 5     |

|           |                              |                                                                                                                                          |                                                             |                    |
|-----------|------------------------------|------------------------------------------------------------------------------------------------------------------------------------------|-------------------------------------------------------------|--------------------|
|           |                              |                                                                                                                                          | version 14, released 2023                                   |                    |
| 28        | Participant checking         | Did participants provide feedback on the findings?                                                                                       | No.                                                         | N/A                |
| Reporting |                              |                                                                                                                                          |                                                             |                    |
| 29        | Quotations presented         | Were participant quotations presented to illustrate the themes / findings? Was each quotation identified? e.g. <i>participant number</i> | Yes and yes.                                                | Pages 7-9; Table 2 |
| 30        | Data and findings consistent | Was there consistency between the data presented and the findings?                                                                       | Yes                                                         | Pages 7-12         |
| 31        | Clarity of major themes      | Were major themes clearly presented in the findings?                                                                                     | Yes                                                         | Pages 7-9          |
| 32        | Clarity of minor themes      | Is there a description of diverse cases or discussion of minor themes?                                                                   | No, insufficient space within limits of maximum word count. | N/A                |
